# Supplementary material for: Nano-scale displacement sensing based on van der Waals interactions
Source: Royal Society of Chemistry journal article supplement (doi:10.1039/c5nr00023h), 2015-01-01
Supplement: c5nr00023h1.pdf [file c5nr00023h1.pdf]

# Supplementary Materials for Nano-scale displacement sensing based on Van der Waals interaction

Lin Hu,<sup>1,2</sup> Jin Zhao,<sup>1,2\*</sup> and Jinlong Yang<sup>1,2\*</sup>

<sup>1</sup>ICQD/Hefei National Laboratory for Physical Sciences at Microscale, and Key Laboratory of Strongly-Coupled Quantum Matter Physics, Chinese Academy of Sciences, and Department of Physics, University of Science and Technology of China, Hefei, Anhui 230026, China

<sup>2</sup>Synergetic Innovation Center of Quantum Information & Quantum Physics, University of Science and Technology of China, Hefei, Anhui 230026, China

\*E-mail: [zhaojin@ustc.edu.cn](mailto:zhaojin@ustc.edu.cn), [jlyang@ustc.edu.cn](mailto:jlyang@ustc.edu.cn)

## I. Vertical transitions corresponding to Peak I and Peak II.

Peak I in Fig.4 (b) corresponds to a vertical transition from an initial state in VB to CBM. In Fig. S1 we plot out the orbital probability density distribution of the initial state and CBM. One can see that for three different stacking configurations, both the initial state and CBM show the bonding character of delocalized states in the interlayer region. Therefore their energy variations are almost the same. That is the reason that Peak I almost keeps constant corresponds to the displacement. Peak II in Fig.4 (b) corresponds to a vertical transition from VBM to a final state in CB. From Fig. S1 one can see that the final state contains the interlayer delocalized probability density and  $\sigma$  bonding character while VBM does not. Therefore  $E_{VBM}$  remains constant and  $E_{PeakII}$  changes remarkably with the energy of the final state.

## II. Fitting $E_{CBM}$ and $E_{PeakII}$ with quadratic equation

Both  $E_{CBM}$  and  $E_{PeakII}$  follow the quadratic equation express as:  $E = E_0 - \beta d_z^{-2}$ . The values of  $E_0$  and  $\beta$  are shown in Table S1. Here  $E_0$  converges to the  $E_{CBM}/E_{PeakII}$  value of single layer BP.  $\beta$  is determined by the interlayer hopping

integral of interacting orbitals, which is proportional to the wave function overlap. The  $\beta$  value of  $E_{CBM}$  is larger than  $E_{PeakII}$ , suggesting the hopping integral of CBM is larger than the final state of peak II in CB. For both  $E_{CBM}$  and  $E_{PeakII}$ ,  $\beta$  is independent for different stacking configurations, which suggests that the interlayer hopping integral does not change much for different stacking configurations. This might be due to the delocalized distribution of the interacting orbitals. The  $d_z^{-2}$  law is described in tight-binding theory in ref [W. A. Harrison, Electronic Structure and Properties of Solids (Freeman, San Francisco,1980)].

|                              |                                        |           |              |           |
|------------------------------|----------------------------------------|-----------|--------------|-----------|
|                              |                                        | $E_{CBM}$ | $E_{PeakII}$ | $E_{gap}$ |
| BLBP                         | $E_0(\text{eV})$                       | -2.31     | 4.80         | 3.4       |
|                              | $\beta(\text{eV} \times \text{\AA}^2)$ | 18.0      | 11.5         | 18.0      |
| Bi-layer<br>MoS <sub>2</sub> | $E_0(\text{eV})$                       |           |              | 3.0       |
|                              | $\beta(\text{eV} \times \text{\AA}^2)$ |           |              | 10.5      |

Table S1. The values of  $E_0$  and  $\beta$  for  $E_{CBM}$  and  $E_{PeakII}$ .

### III. The electronic structure dependence on interlayer twisting.

The electronic structure of BLBP is also sensitive to the interlayer twisting. We have investigated the band gap change for the A-A stacking when the top layer is twisted around z axis shown in Fig.S2. The band gap varies from 1.75 eV to 2.34 eV when the twist angle  $\theta$  changes from  $0^\circ$  to  $180^\circ$ . The total energy is within 13 meV. The interlayer distance  $d_z$  changes from 3.22 Å to 4.12 Å. The lowest energy configuration corresponding to  $\theta=0^\circ$  has the smallest  $d_z$ , in which the CBM is stabilized to the lowest energy because of its  $\sigma$  bonding character.

The absorption intensity of different twisting angle is also investigated. The absorption intensity for A-A stacking BLBP with different interlayer twist angle is shown in Fig.S3 (a). The lowest two peaks corresponding to two direct excitation involves CBM and VBM as shown in Fig.S3 (b). Peak I corresponding to the vertical excitation to CBM does not change with the twist angle. Peak II corresponding to the vertical excitation from VBM changes from 3.65 eV to 4.18 eV when  $\theta$  changes from  $0^\circ$  to  $180^\circ$ .

### IV. Comparison with bi-layer MoS<sub>2</sub> and black phosphorus

We have compared BLBP with other corrugated bi-layer materials MoS<sub>2</sub> and black phosphorus. Fig. S4 shows the top view and side view of different stacking configurations of MoS<sub>2</sub> and black phosphorus. One can see that MoS<sub>2</sub> has similar structure with blue phosphorus (Fig. S4 (a) ), which belongs to the graphene-like structures. As shown in Fig.5, similar with BLBP,  $E_{gap}$  of bi-layer MoS<sub>2</sub> can be fitted with  $E = E_0 - \beta d_z^{-2}$ . In contrast, the corrugation of black phosphorus is very large as shown in Fig. S4 (b), therefore the unified

$E_{gap} \propto dz^{-2}$  trend for different stacking configuration fails.

## V. The effects of temperature

In order to convince the sensor works well in room temperature, we have performed ab-initio molecular dynamics investigation on BLBP with different stacking configurations. All the simulations are performed using VASP code.

We extended our unit cell to  $(5 \times 5)$ . A time step of 1fs within a NVT ensemble was used. The system was equilibrated with a target temperature of 100K, 200K, 300K and 400K during 2ps. During all these molecular dynamics simulations, we did not find distinct change of the bi-layer atomic structure. As an example, we took snapshots every 100 fs in the molecular dynamics simulation at 300K and showed the interlayer distance  $d_z$  and band gap  $E_{gap}$  in Fig. S5 (a). We found that for all the three stacking configurations,  $d_z$  increases slightly when the temperature increases and it reaches the thermal equilibrium after 700 fs approximately. In order to test the  $d_z^{-2}$  law at different temperature, we obtained the  $d_z$  and  $E_{gap}$  for different temperatures after the systems reached thermal equilibrium. We found that  $d_z$  and  $E_{gap}$  at the temperature from 0 K ~ 400K for the 3 stacking configurations still follow the  $d_z^{-2}$  law as shown in Fig.S5 (b). Therefore we believe that the temperature does not affect the displacement measurement strongly.

## VI. The test of strain effects

During the measurements, pulling one layer can be compensated by a local elastic deformation such as stretching or bending that restores the minimum energy stacking on some area. In order to test that possibility, we have calculated the elastic properties of BLBP. The biaxial strain can be imposed on BP layers by changing the lattice parameters a and b equally as shown in Fig. S6. Our results show that BP can sustain a stress up to about 9 N/m (Fig. S6 (a)). That corresponding tensile strain limits is 18%. This predicted elastic strain limit is close to that found in other 2D materials such as graphene, MoS<sub>2</sub> and black phosphorus respectively,<sup>1-3</sup> suggesting that BP is highly flexible and may have potential applications in flexible display. Our calculation of the total energy change as a function of the applied strain indicates the stretching (Fig.S6 (b)) and bending are much more difficult than interlayer displacement.

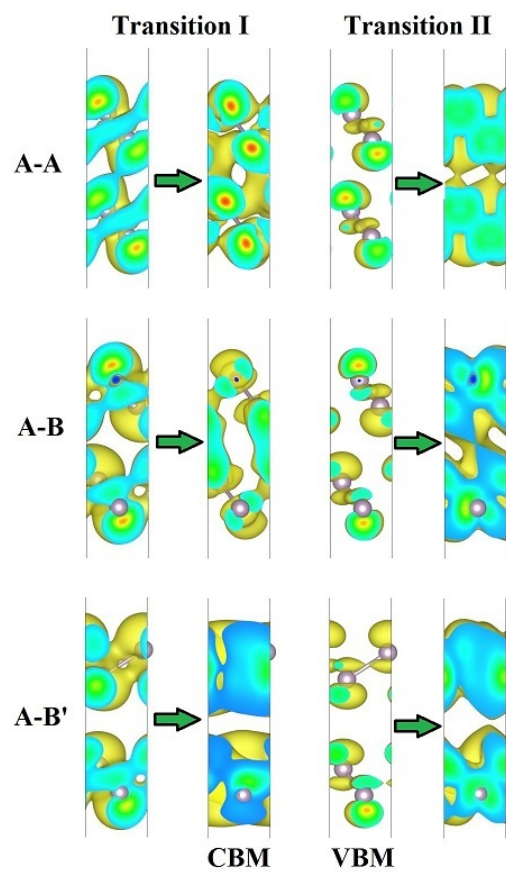

**Fig. S1.** The orbital probability density distributions of the initial and final states of vertical transitions corresponding to Peak I and Peak II for A-A, A-B and A-B' stacking BLBP.

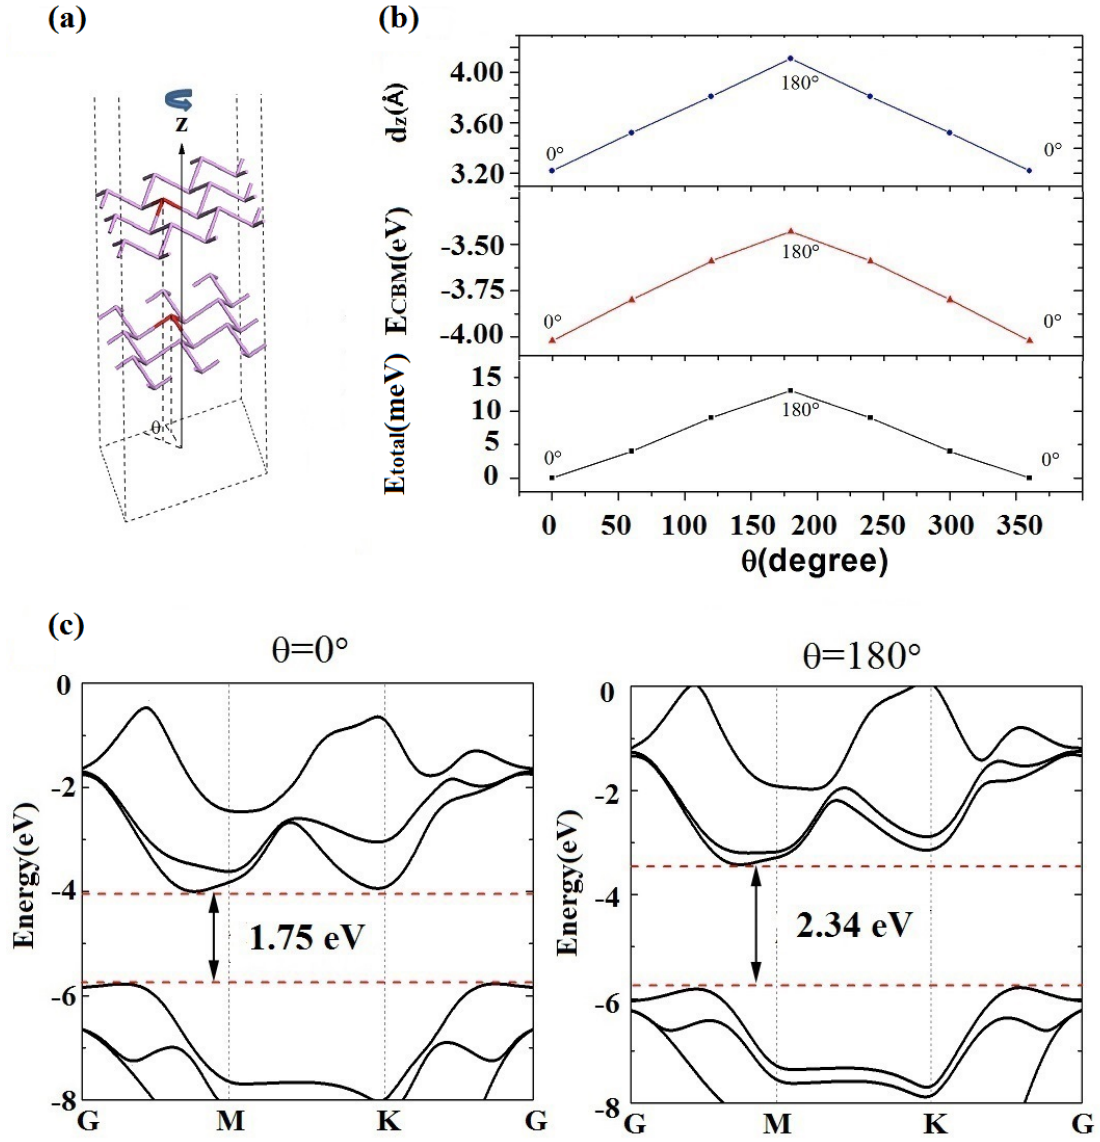

**Fig. S2.** The electronic structure dependence on interlayer twisting for A-A stacking BLBP. (a) The schematic diagram of interlayer twisting. (b) The change of  $E_{total}$ ,  $E_{CBM}$  and  $d_z$  with twisting angle  $\theta$ . (c) The plotting of band structure corresponding to  $\theta = 0^\circ$  and  $\theta = 180^\circ$ .

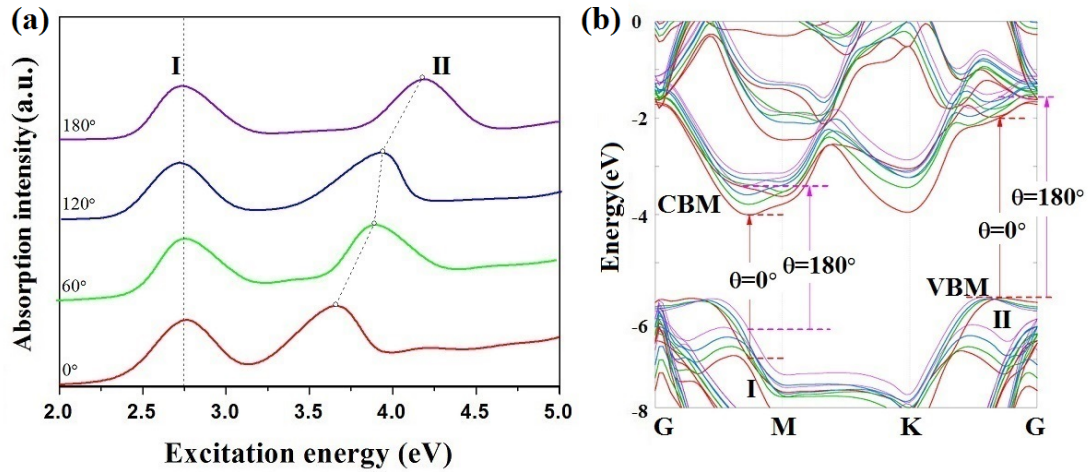

**Fig. S3.** The Absorption intensity (a) and band structure (b) of A-A stacking BLBP when the interlayer twisting angle  $\theta$  changes from  $0^\circ$  (red line) to  $180^\circ$  (purple line). The two absorption peaks below 5 eV are marked as peaks I and II in (a). The corresponding vertical transitions for  $\theta = 0^\circ$  and  $\theta = 180^\circ$  are indicated by red and purple arrows in (b).

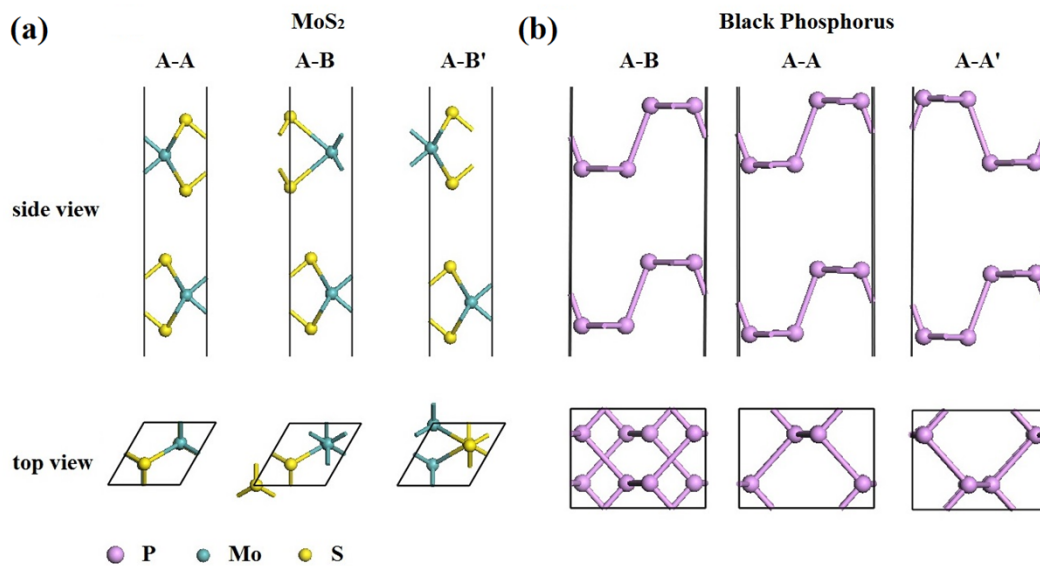

**Fig. S4.** The side view and top view of atomic structure of A-A, A-B, and A-B' stacking MoS<sub>2</sub> and black phosphorus.

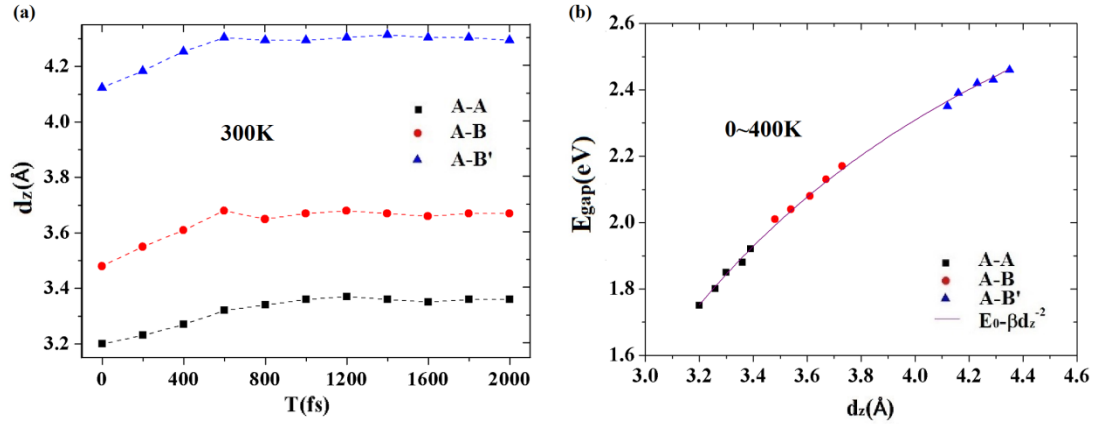

**Fig. S5.** (a) The change of  $d_z$  and  $E_{gap}$  during the molecular dynamics for A-A, A-B and A-B' stacking configurations with a target temperature of 300K. (b) The correlation of  $d_z$  and  $E_{gap}$  for different configurations at 0K, 100K, 200K, 300K and 400K.

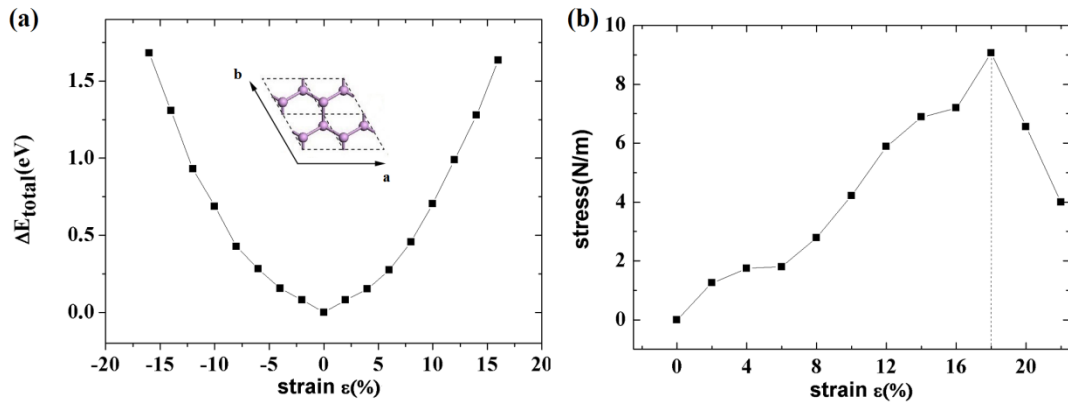

**Fig. S6.** (a) The stress as a function of tensile load for BP. (b) The change of total energy as a function of applied strain.

- 1 Peng, X., Wei, Q. & Andrew, C. Strain-engineered direct-indirect band gap transition and its mechanism in two-dimensional phosphorene. *Phys. Rev. B* **90**, 085402 (2014).
- 2 Castellanos-Gomez, A. *et al.* Mechanical Properties of Freely Suspended Semiconducting Graphene-like Layers Based on MoS<sub>2</sub>. *Nanoscale Res. Lett.* **7**, 233 (2012).
- 3 Lee, C., Wei, X., Kysar, J. W. & Hone, J. Measurement of the Elastic Properties and Intrinsic Strength of Monolayer Graphene. *Science* **321**, 385-388 (2008).
